# Supplementary material
Source: publisher figshare collection journal article supplement (https://acs.figshare.com/ndownloader/files/5217103)

# A Simple and General Chiral Silicon Lewis Acid for Asymmetric Synthesis: Highly Enantioselective [3+2] Acylhydrazone-Enol Ether Cycloadditions

Seiji Shirakawa, Pamela J. Lombardi, and James L. Leighton\*

*Department of Chemistry, Columbia University, New York, New York, 10027*

## Supporting Information

**General Information.** All reactions were carried out under an atmosphere of nitrogen in flame- or oven-dried glassware with magnetic stirring unless otherwise indicated. Degassed solvents were purified by passage through an activated alumina column.  $^1\text{H}$  NMR spectra were recorded on a Bruker DPX-300 (300 MHz) spectrometer and are reported in ppm from  $\text{CDCl}_3$  internal standard (7.26 ppm). Data are reported as follows: (s = singlet, br s = broad singlet, d = doublet, t = triplet, q = quartet, quin = quintet, sep = septet, m = multiplet, dd = doublet of doublets, td = triplet of doublets, tt = triplet of triplets, dq = doublet of quartets, ddt = doublet of doublet of triplets; coupling constant(s) in Hz; integration; assignment). Proton decoupled  $^{13}\text{C}$  NMR spectra were recorded on a Bruker DPX-300 (75 MHz) and are reported in ppm from  $\text{CDCl}_3$  internal standard (77.0 ppm). Infrared spectra were recorded on a Perkin Elmer Paragon 1000 FT-IR spectrometer. Optical rotations were recorded on a Jasco DIP-1000 digital polarimeter.

**Preparation of reagent (S,S)-1:** A detailed procedure for the preparation of (S,S)-1 has been previously described.<sup>1</sup> See the supporting information files.

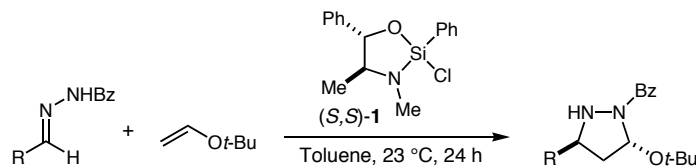

**General procedure for the enantioselective [3+2] cycloaddition of benzoylhydrazones with *tert*-butyl vinyl ether promoted by (S,S)-1:** To a solution of the benzoylhydrazone (0.200 mmol) and (S,S)-1

---

(1) (a) Berger, R.; Duff, K.; Leighton, J. L. *J. Am. Chem. Soc.* **2004**, *126*, 5686-5687. (b) Shirakawa, S.; Berger, R.; Leighton, J. L. *J. Am. Chem. Soc.* **2005**, *127*, 2858-2859.

(91.2 mg, 0.300 mmol) in toluene (2 mL) is added *tert*-butyl vinyl ether (78.9  $\mu$ l, 0.600 mmol) and the resulting mixture is stirred at 23 °C for 24 h. The reaction is quenched by the addition of H<sub>2</sub>O (5 mL) and the resulting mixture is stirred for 15 min, and then diluted with EtOAc (5 mL). The phases are separated, and the aqueous layer is extracted with EtOAc (5 mL x 2). The combined organic layers are dried (MgSO<sub>4</sub>), filtered and concentrated. Purification by flash chromatography on silica gel affords the products.

**Characterization data for the cycloaddition products from Table 1 and Scheme 4:**

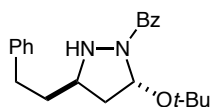

**(3*R*,5*R*)-1-(Benzoyl)-5-(*tert*-butoxy)-3-(phenethyl)pyrazolidine:**  $[\alpha]_D^{26} = +99.9^\circ$  (*c* 1.0, CHCl<sub>3</sub>); <sup>1</sup>H NMR (300 MHz, CDCl<sub>3</sub>)  $\delta$  7.67 (dd, 2H, *J* = 1.5, 8.0 Hz, Ar-**H**), 7.33-7.44 (m, 3H, Ar-**H**), 7.10-7.22 (m, 3H, Ar-**H**), 7.00 (d, 2H, *J* = 7.9 Hz, Ar-**H**), 6.18 (br d, 1H, *J* = 4.0 Hz, NH), 4.05 (br d, 1H, *J* = 11.6 Hz, CHO*t*-Bu), 2.77-2.91 (br m, 1H, NHCH), 2.60 (t, 2H, *J* = 7.6 Hz, PhCH<sub>2</sub>), 2.48 (ddd, 1H, *J* = 6.8, 7.7, 13.2 Hz, CHCH<sub>2</sub>CH), 1.71-1.95 (m, 2H, PhCH<sub>2</sub>CH<sub>2</sub>), 1.60 (ddd, 1H, *J* = 2.9, 8.5, 13.2 Hz, CHCH<sub>2</sub>CH), 1.30 (s, 9H, C(CH<sub>3</sub>)<sub>3</sub>); <sup>13</sup>C NMR (75 MHz, CDCl<sub>3</sub>)  $\delta$  170.7, 141.0, 135.1, 130.4, 129.2, 128.34, 128.30, 127.4, 125.9, 81.9, 74.8, 60.0, 42.7, 34.5, 33.0, 28.5; IR (thin film) 3238, 2978, 2937, 1643, 1627, 1389, 1368, 1057, 1026, 699 cm<sup>-1</sup>; LRMS (FAB+) calcd for C<sub>22</sub>H<sub>29</sub>N<sub>2</sub>O<sub>2</sub>: 353 ([M+H]<sup>+</sup>), found 353 ([M+H]<sup>+</sup>).

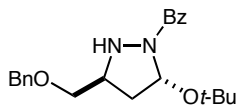

**(3*S*,5*R*)-1-(Benzoyl)-3-(benzyloxymethyl)-5-(*tert*-butoxy)pyrazolidine:**  $[\alpha]_D^{24} = +63.4^\circ$  (*c* 1.0, CHCl<sub>3</sub>); <sup>1</sup>H NMR (300 MHz, CDCl<sub>3</sub>)  $\delta$  7.66-7.69 (m, 2H, Ar-**H**), 7.24-7.43 (m, 8H, Ar-**H**), 6.20 (br d, 1H, *J* = 4.6 Hz, NH), 4.61 (br d, 1H, *J* = 11.1 Hz, CHO*t*-Bu), 4.54 (d, 1H, *J* = 12.1 Hz, PhCH<sub>2</sub>), 4.49 (d, 1H, *J* = 12.1 Hz, PhCH<sub>2</sub>), 3.62 (dd, 1H, *J* = 3.9, 10.0 Hz, OCH<sub>2</sub>CH), 3.53 (dd, 1H, *J* = 4.7, 10.0 Hz, OCH<sub>2</sub>CH), 3.15-3.27 (br m, 1H, NHCH), 2.37 (ddd, 1H, *J* = 6.5, 8.5, 13.1 Hz, CHCH<sub>2</sub>CH), 1.69 (ddd, 1H, *J* = 2.6, 8.6, 13.1 Hz, CHCH<sub>2</sub>CH), 1.29 (s, 9H, C(CH<sub>3</sub>)<sub>3</sub>); <sup>13</sup>C NMR (75 MHz, CDCl<sub>3</sub>)  $\delta$  170.6, 137.9, 135.1, 130.5, 129.1, 128.4, 127.7, 127.4, 81.5, 74.7, 73.0, 68.8, 59.8, 38.6, 28.5; IR (thin film) 3258, 2975, 2932,

2866, 1643, 1474, 1367, 1100, 1059, 1028, 697  $\text{cm}^{-1}$ ; LRMS (FAB+) calcd for  $\text{C}_{22}\text{H}_{29}\text{N}_2\text{O}_3$ : 369 ( $[\text{M}+\text{H}]^+$ ), found 369 ( $[\text{M}+\text{H}]^+$ ).

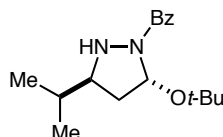

**(3*S*,5*R*)-1-(Benzoyl)-5-(*tert*-butoxy)-3-(isopropyl)pyrazolidine:**  $[\alpha]_{\text{D}}^{24} = +100.9^\circ$  (*c* 0.65,  $\text{CHCl}_3$ );  $^1\text{H}$  NMR (300 MHz,  $\text{CDCl}_3$ )  $\delta$  7.74 (dd, 2H,  $J = 1.4, 8.1$  Hz, Ar-**H**), 7.33-7.44 (m, 3H, Ar-**H**), 6.18 (br s, 1H, **NH**), 4.10 (br d, 1H,  $J = 11.0$  Hz,  $\text{CHOt-Bu}$ ), 2.65 (br quin,  $J = 8.5$  Hz, 1H, **NHCH**), 2.44 (ddd, 1H,  $J = 6.8, 7.9, 13.2$  Hz,  $\text{CHCH}_2\text{CH}$ ), 1.58-1.71 (m, 1H + 1H,  $\text{CHCH}_2\text{CH} + (\text{CH}_3)_2\text{CH}$ ), 1.30 (s, 9H,  $\text{C}(\text{CH}_3)_3$ ), 0.92 (d, 3H,  $J = 6.7$  Hz,  $(\text{CH}_3)_2\text{CH}$ ), 0.90 (d, 3H,  $J = 6.7$  Hz,  $(\text{CH}_3)_2\text{CH}$ );  $^{13}\text{C}$  NMR (75 MHz,  $\text{CDCl}_3$ )  $\delta$  170.3, 135.0, 130.3, 129.2, 127.3, 82.0, 74.7, 67.1, 40.9, 31.1, 28.5, 20.5, 19.2; IR (thin film) 3227, 2968, 2947, 2875, 1618, 1509, 1389, 1363, 1052, 694  $\text{cm}^{-1}$ ; LRMS (FAB+) calcd for  $\text{C}_{17}\text{H}_{27}\text{N}_2\text{O}_2$ : 291 ( $[\text{M}+\text{H}]^+$ ), found 291 ( $[\text{M}+\text{H}]^+$ ).

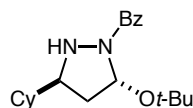

**(3*S*,5*R*)-1-(Benzoyl)-5-(*tert*-butoxy)-3-(cyclohexyl)pyrazolidine:**  $[\alpha]_{\text{D}}^{25} = +82.7^\circ$  (*c* 1.2,  $\text{CHCl}_3$ );  $^1\text{H}$  NMR (300 MHz,  $\text{CDCl}_3$ )  $\delta$  7.71 (dd, 2H,  $J = 1.4, 8.0$  Hz, Ar-**H**), 7.30-7.41 (m, 3H, Ar-**H**), 6.16 (br s, 1H, **NH**), 4.06 (br d, 1H,  $J = 11.0$  Hz,  $\text{CHOt-Bu}$ ), 2.59-2.71 (br m, 1H, **NHCH**), 2.43 (ddd, 1H,  $J = 6.8, 7.6, 13.2$  Hz,  $\text{CHCH}_2\text{CH}$ ), 1.58-1.79 (m, 4H + 1H + 1H,  $\text{CH}_2\text{CH}_2 + \text{CHCH}_2\text{CH} + \text{CH}_2\text{CHCH}_2$ ), 1.29 (s, 9H,  $\text{C}(\text{CH}_3)_3$ ), 1.08-1.41 (m, 4H,  $\text{CH}_2\text{CH}_2$ ), 0.85-1.02 (m, 2H,  $\text{CH}_2\text{CH}_2$ );  $^{13}\text{C}$  NMR (75 MHz,  $\text{CDCl}_3$ )  $\delta$  170.3, 135.0, 130.3, 129.2, 127.3, 81.8, 74.7, 66.1, 41.0, 40.9, 31.0, 29.6, 28.5, 26.3, 25.8, 25.7; IR (thin film) 3238, 2974, 2923, 2856, 1646, 1473, 1447, 1392, 1363, 1054, 1029, 695  $\text{cm}^{-1}$ ; LRMS (FAB+) calcd for  $\text{C}_{20}\text{H}_{31}\text{N}_2\text{O}_2$ : 331 ( $[\text{M}+\text{H}]^+$ ), found 331 ( $[\text{M}+\text{H}]^+$ ).

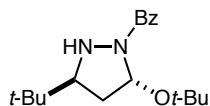

**(3*S*,5*R*)-1-(Benzoyl)-5-(*tert*-butoxy)-3-(*tert*-butyl)pyrazolidine:**  $[\alpha]_D^{25} = +108.8^\circ$  (*c* 0.73, CHCl<sub>3</sub>); <sup>1</sup>H NMR (300 MHz, CDCl<sub>3</sub>)  $\delta$  7.73 (dd, 2H, *J* = 1.5, 8.0 Hz, Ar-**H**), 7.30-7.42 (m, 3H, Ar-**H**), 6.15 (br s, 1H, **NH**), 4.16 (br d, 1H, *J* = 11.0 Hz, **CHOt**-Bu), 2.68-2.79 (br m, 1H, **NHCH**), 2.28 (ddd, 1H, *J* = 6.6, 8.3, 13.2 Hz, **CHCH**<sub>2</sub>**CH**), 1.69 (ddd, 1H, *J* = 2.6, 9.0, 13.2 Hz, **CHCH**<sub>2</sub>**CH**), 1.28 (s, 9H, OC(**CH**<sub>3</sub>)<sub>3</sub>), 0.91 (s, 9H, **CHC**(**CH**<sub>3</sub>)<sub>3</sub>); <sup>13</sup>C NMR (75 MHz, CDCl<sub>3</sub>)  $\delta$  170.1, 135.1, 130.3, 129.3, 127.3, 81.8, 74.6, 69.8, 38.2, 31.3, 28.5, 26.5; IR (thin film) 3248, 2968, 2875, 1618, 1374, 1057, 793, 715, 694 cm<sup>-1</sup>; LRMS (FAB+) calcd for C<sub>18</sub>H<sub>29</sub>N<sub>2</sub>O<sub>2</sub>: 305 ([M+H]<sup>+</sup>), found 305 ([M+H]<sup>+</sup>).

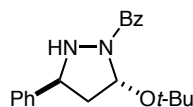

**(3*S*,5*R*)-1-(Benzoyl)-5-(*tert*-butoxy)-3-(phenyl)pyrazolidine:**  $[\alpha]_D^{24} = +40.3^\circ$  (*c* 0.80, CHCl<sub>3</sub>); <sup>1</sup>H NMR (300 MHz, CDCl<sub>3</sub>)  $\delta$  7.73 (dd, 2H, *J* = 1.3, 8.0 Hz, Ar-**H**), 7.23-7.43 (m, 8H, Ar-**H**), 6.38 (br d, 1H, *J* = 5.0 Hz, **NH**), 4.40 (d, 1H, *J* = 11.4 Hz, **CHOt**-Bu), 4.01-4.10 (m, 1H, **NHCH**), 2.75 (ddd, 1H, *J* = 6.4, 9.1, 13.5 Hz, **CHCH**<sub>2</sub>**CH**), 2.12 (ddd, 1H, *J* = 2.1, 7.4, 13.5 Hz, **CHCH**<sub>2</sub>**CH**), 1.36 (s, 9H, C(**CH**<sub>3</sub>)<sub>3</sub>); <sup>13</sup>C NMR (75 MHz, CDCl<sub>3</sub>)  $\delta$  170.3, 139.0, 134.8, 130.6, 129.3, 128.7, 128.1, 127.7, 127.4, 81.6, 75.1, 64.1, 43.4, 28.6; IR (thin film) 3248, 2978, 2926, 1643, 1472, 1368, 1052, 1026, 761, 699 cm<sup>-1</sup>; LRMS (FAB+) calcd for C<sub>20</sub>H<sub>25</sub>N<sub>2</sub>O<sub>2</sub>: 325 ([M+H]<sup>+</sup>), found 325 ([M+H]<sup>+</sup>).

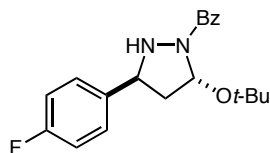

**(3*S*,5*R*)-1-(Benzoyl)-5-(*tert*-butoxy)-3-(4-fluorophenyl)pyrazolidine:**  $[\alpha]_D^{26} = +41.0^\circ$  (*c* 1.0, CHCl<sub>3</sub>); <sup>1</sup>H NMR (300 MHz, CDCl<sub>3</sub>)  $\delta$  7.70-7.74 (m, 2H, Ar-**H**), 7.32-7.44 (m, 5H, Ar-**H**), 6.99-7.04 (m, 2H, Ar-**H**), 6.37 (br d, 1H, *J* = 4.9 Hz, **NH**), 4.33 (d, 1H, *J* = 11.3 Hz, **CHOt**-Bu), 4.00-4.09 (m, 1H, **NHCH**), 2.74 (ddd, 1H, *J* = 6.3, 9.2, 13.5 Hz, **CHCH**<sub>2</sub>**CH**), 2.07 (ddd, 1H, *J* = 2.0, 7.2, 13.5 Hz, **CHCH**<sub>2</sub>**CH**), 1.36 (s, 9H, C(**CH**<sub>3</sub>)<sub>3</sub>); <sup>13</sup>C NMR (75 MHz, CDCl<sub>3</sub>)  $\delta$  170.2, 164.1, 160.8, 134.91, 134.87,

134.7, 130.6, 129.6, 129.5, 129.3, 127.5, 115.7, 115.4, 81.5, 75.2, 63.3, 43.3, 28.5; IR (thin film) 3244, 2976, 1645, 1514, 1472, 1368, 1227, 1052, 836, 697  $\text{cm}^{-1}$ ; LRMS (FAB+) calcd for  $\text{C}_{20}\text{H}_{24}\text{FN}_2\text{O}_2$ : 343 ( $[\text{M}+\text{H}]^+$ ), found 343 ( $[\text{M}+\text{H}]^+$ ).

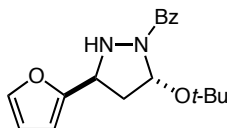

**(3*S*,5*R*)-1-(Benzoyl)-5-(*tert*-butoxy)-3-(furan-2-yl)pyrazolidine:**  $[\alpha]_{\text{D}}^{23} = +42.3^\circ$  (*c* 1.3,  $\text{CHCl}_3$ );  $^1\text{H}$  NMR (300 MHz,  $\text{CDCl}_3$ )  $\delta$  7.70 (dd, 2H,  $J = 1.5, 8.2$  Hz, Ar-**H**), 7.31-7.44 (m, 4H, Ar-**H**), 6.27-6.35 (m, 1H + 2H, **NH** + Ar-**H**), 4.53 (d, 1H,  $J = 11.6$  Hz, **CHOt**-Bu), 4.02-4.11 (m, 1H, **NHCH**), 2.69 (ddd, 1H,  $J = 6.6, 8.6, 13.4$  Hz, **CHCH**<sub>2</sub>**CH**), 2.21 (ddd, 1H,  $J = 2.7, 8.5, 13.4$  Hz, **CHCH**<sub>2</sub>**CH**), 1.33 (s, 9H, **C(CH**<sub>3</sub>)<sub>3</sub>);  $^{13}\text{C}$  NMR (75 MHz,  $\text{CDCl}_3$ )  $\delta$  170.7, 151.3, 142.4, 134.8, 130.7, 129.3, 127.5, 110.4, 108.1, 81.6, 75.0, 57.6, 41.7, 28.5; IR (thin film) 3239, 2974, 2933, 1646, 1473, 1366, 1188, 1050, 1025, 696  $\text{cm}^{-1}$ ; LRMS (FAB+) calcd for  $\text{C}_{18}\text{H}_{23}\text{N}_2\text{O}_3$ : 315 ( $[\text{M}+\text{H}]^+$ ), found 315 ( $[\text{M}+\text{H}]^+$ ).

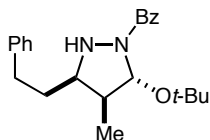

**(3*R*,4*S*,5*R*)-1-(Benzoyl)-5-(*tert*-butoxy)-4-(methyl)-3-(phenethyl)pyrazolidine:**  $[\alpha]_{\text{D}}^{26} = +115.6^\circ$  (*c* 1.1,  $\text{CHCl}_3$ );  $^1\text{H}$  NMR (300 MHz,  $\text{CDCl}_3$ )  $\delta$  7.68 (d, 2H,  $J = 6.6$  Hz, Ar-**H**), 7.34-7.45 (m, 3H, Ar-**H**), 7.12-7.23 (m, 3H, Ar-**H**), 7.04 (d, 2H,  $J = 6.7$  Hz, Ar-**H**), 5.99 (d, 1H,  $J = 5.6$  Hz, **NH**), 4.11 (br d, 1H,  $J = 9.5$  Hz, **CHOt**-Bu), 2.98-3.09 (br m, 1H, **NHCH**), 2.50-2.70 (m, 2H, **PhCH**<sub>2</sub>), 2.38 (m, 1H,  $J = 7.3$  Hz, **CHCH**<sub>3</sub>), 1.62-1.83 (m, 2H, **PhCH**<sub>2</sub>**CH**<sub>2</sub>), 1.29 (s, 9H, **C(CH**<sub>3</sub>)<sub>3</sub>), 0.96 (d, 3H,  $J = 7.3$  Hz, **CHCH**<sub>3</sub>);  $^{13}\text{C}$  NMR (75 MHz,  $\text{CDCl}_3$ )  $\delta$  170.2, 141.3, 135.1, 130.4, 129.2, 128.5, 128.3, 127.4, 125.9, 82.5, 74.7, 60.9, 40.6, 33.3, 31.9, 28.3, 8.9; IR (thin film) 3237, 2971, 2936, 1630, 1497, 1388, 1368, 1195, 1104  $\text{cm}^{-1}$ ; LRMS (FAB+) calcd for  $\text{C}_{23}\text{H}_{31}\text{N}_2\text{O}_2$ : 367 ( $[\text{M}+\text{H}]^+$ ), found 367 ( $[\text{M}+\text{H}]^+$ ).

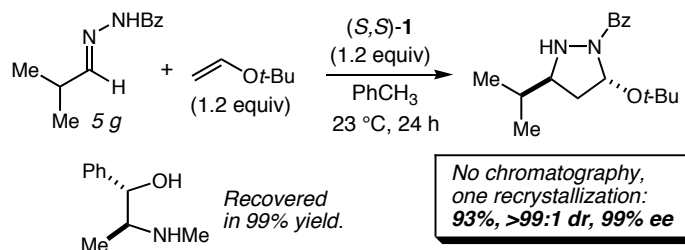

**Procedure for the diastereo- and enantioselective [3+2] cycloaddition of benzoic acid isobutyridene-hydrazide with *tert*-butyl vinyl ether on a 5.0 g scale:** To a solution of (S,S)-1 (9.60 g, 31.6 mmol) in toluene (200 mL) was added benzoic acid isobutyridene-hydrazide (5.00 g, 26.3 mmol). After 10 min, *tert*-butyl vinyl ether (4.15 mL, 31.6 mmol) was added. After 24 h, the reaction was quenched by the addition of H<sub>2</sub>O (150 mL). The resulting mixture was stirred for 30 min, and the phases were then separated. The aqueous layer was extracted with EtOAc (100 mL x 2). The combined organic layers were washed with H<sub>2</sub>O (100 mL), and then dried (MgSO<sub>4</sub>) and filtered. The filtrate was concentrated to a volume of ~50 mL, and then hexane (50 mL) was gradually added. The resulting solution was placed in a refrigerator for 3 h and the resulting crystalline solid was filtered and dried to yield 1-(benzoyl)-5-(*tert*-butoxy)-3-(isopropyl)pyrazolidine as a white crystalline solid (7.08 g, 24.4 mmol, 93% yield). [ $\alpha$ ]<sub>D</sub><sup>22</sup> = +108.0° (*c* 1.0, CHCl<sub>3</sub>). The enantiomeric excess of this material was determined to be 99% by chiral HPLC analysis (see below for the details of the assay).

The pseudoephedrine was recovered by the following procedure: the combined aqueous extracts from the above workup were basified with 1N aqueous NaOH (150 mL) and the cloudy suspension was extracted with EtOAc (100 mL x 3). The combined organic layers were washed with H<sub>2</sub>O (50 mL) and brine (100 mL), and then dried (MgSO<sub>4</sub>), filtered and concentrated to yield pure (S,S)-pseudoephedrine as a white solid (5.22 g, 31.6 mmol, >99% recovery).

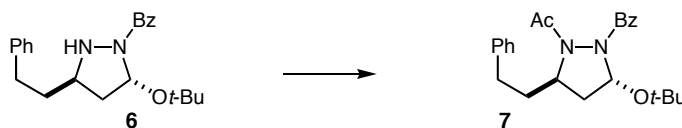

**(3R,5R)-2-(Acetyl)-1-(benzoyl)-5-(*tert*-butoxy)-3-(phenethyl)pyrazolidine:** To a cooled (0 °C) solution of 1-(benzoyl)-5-(*tert*-butoxy)-3-(phenethyl)pyrazolidine (1.06 g, 3.00 mmol), 4-(dimethylamino)pyridine (73.3 mg, 0.600 mmol), and pyridine (2.43 mL, 30.0 mmol) in CH<sub>2</sub>Cl<sub>2</sub> (25 mL)

was added acetyl chloride (2.13 mL, 30.0 mmol). The reaction mixture was allowed to warm to ambient temperature and stirred for 2 h. The reaction was quenched by the addition of saturated aqueous NaHCO<sub>3</sub> (20 mL) and the phases were separated. The aqueous layer was extracted with CH<sub>2</sub>Cl<sub>2</sub> (10 mL x 2), and the combined organic layers were dried (MgSO<sub>4</sub>), filtered, concentrated. The residue was purified by flash chromatography on silica gel (hexane/EtOAc gradient 2/1 to 1/1) to yield 2-(acetyl)-1-(benzoyl)-5-(*tert*-butoxy)-3-(phenethyl)pyrazolidine as a slightly yellow oil (1.17 g, 2.96 mmol, 99% yield).  $[\alpha]_D^{27} = -25.7^\circ$  (*c* 1.7, CHCl<sub>3</sub>); <sup>1</sup>H NMR (300 MHz, CDCl<sub>3</sub>)  $\delta$  7.65-7.68 (br m, 2H, Ar-**H**), 7.38-7.48 (m, 3H, Ar-**H**), 7.15-7.26 (m, 5H, Ar-**H**), 5.54 (br d, 1H, *J* = 4.2 Hz, CH*Ot*-Bu), 4.25 and 4.73 (br, 1H, NAcCH), 2.62-3.03 (m, 2H, PhCH<sub>2</sub>), 1.76-2.39 (m, 2H + 2H + 3H, PhCH<sub>2</sub>CH<sub>2</sub>, CHCH<sub>2</sub>CH, C=OCH<sub>3</sub>), 0.73 and 1.24 (br, 9H, C(CH<sub>3</sub>)<sub>3</sub>); IR (thin film) 3062, 3027, 2975, 2936, 2864, 1679, 1664, 1449, 1393, 1379, 1319, 1102, 1056, 911, 732, 700 cm<sup>-1</sup>; LRMS (FAB+) calcd for C<sub>24</sub>H<sub>30</sub>N<sub>2</sub>O<sub>3</sub>: 394 (M<sup>+</sup>), found 394 (M<sup>+</sup>).

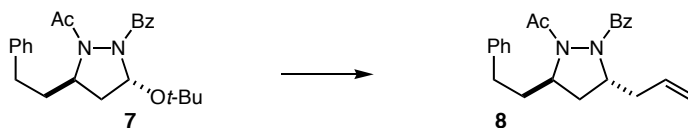

**(3*R*,5*R*)-2-(Acetyl)-5-(allyl)-1-(benzoyl)-3-(phenethyl)pyrazolidine:** To a cooled (-15 °C) solution of 2-(acetyl)-1-(benzoyl)-5-(*tert*-butoxy)-3-(phenethyl)pyrazolidine (0.370 g, 0.938 mmol) and allyltrimethylsilane (0.745 mL, 4.69 mmol) in CH<sub>2</sub>Cl<sub>2</sub> (10 mL) was added trimethylsilyl trifluoromethanesulfonate (204  $\mu$ L, 1.13 mmol). After 24 h, the reaction was quenched by the addition of H<sub>2</sub>O (15 mL). The layers were separated and the aqueous layer was extracted with CH<sub>2</sub>Cl<sub>2</sub> (15 mL x 2). The combined organic layers were dried (MgSO<sub>4</sub>), filtered, concentrated. The residue was purified by flash chromatography on silica gel (CH<sub>2</sub>Cl<sub>2</sub>/EtOAc gradient 20/1 to 15/1) to yield 2-(acetyl)-5-(allyl)-1-(benzoyl)-3-(phenethyl)pyrazolidine as a white solid (222 mg, 0.612 mmol, 65% yield).  $[\alpha]_D^{27} = -44.6^\circ$  (*c* 0.75, CHCl<sub>3</sub>); <sup>1</sup>H NMR (300 MHz, CDCl<sub>3</sub>)  $\delta$  7.64 (d, 2H, *J* = 7.2 Hz, Ar-**H**), 7.50 (t, 1H, *J* = 7.2 Hz, Ar-**H**), 7.42 (t, 2H, *J* = 7.2 Hz, Ar-**H**), 7.13-7.28 (m, 5H, Ar-**H**), 5.65-5.78 (m, 1H, CH=CH<sub>2</sub>), 5.09-5.17 (m, 2H, CH=CH<sub>2</sub>), 4.41-4.58 (br m, 1H, NAcCH), 4.12-4.31 (br m, 1H, NBzCH), 2.61-2.80 (m, 2H, PhCH<sub>2</sub>), 2.39-2.49 (m, 1H, CH<sub>2</sub>CH=CH<sub>2</sub>), 2.16-2.28 (m, 1H + 2H + 3H, CH<sub>2</sub>CH=CH<sub>2</sub> + CHCH<sub>2</sub>CH, COCH<sub>3</sub>), 1.65-1.78 (m, 2H, PhCH<sub>2</sub>CH<sub>2</sub>); <sup>13</sup>C NMR (75 MHz, CDCl<sub>3</sub>)  $\delta$  172.9, 172.7, 141.5, 134.0, 133.1, 131.6,

128.6, 128.4, 128.3, 127.9, 125.8, 119.0, 61.0, 55.8, 37.8, 37.3, 36.3, 32.6, 21.3; IR (thin film) 3083, 3025, 2980, 2929, 2852, 1671, 1447, 1402, 1351, 1319, 921, 703  $\text{cm}^{-1}$ ; LRMS (FAB+) calcd for  $\text{C}_{23}\text{H}_{27}\text{N}_2\text{O}_2$ : 363 ( $[\text{M}+\text{H}]^+$ ), found 363 ( $[\text{M}+\text{H}]^+$ ).

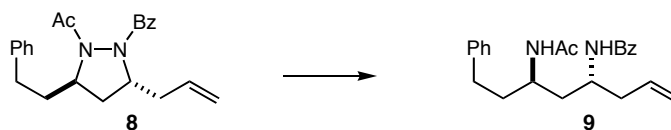

**(4*R*,6*R*)-6-(Acetylamino)-4-(benzoylamino)-8-phenyl-1-octene:** To a degassed solution of 2-(acetyl)-5-(allyl)-1-(benzoyl)-3-(phenethyl)pyrazolidine (72.5 mg, 0.200 mmol) in MeOH (2 mL) was added  $\text{SmI}_2$  (6.00 mL, 0.600 mmol, 0.1 M in THF). After 30 min, the reaction mixture was concentrated. The residue was purified by flash chromatography on silica gel ( $\text{CH}_2\text{Cl}_2$ /Acetone gradient 5/1 to 1/1) to give 6-(acetylamino)-4-(benzoylamino)-8-phenyl-1-octene as a slightly yellow solid (63.4 mg, 0.174 mmol, 87% yield).  $[\alpha]_D^{26} = -3.2^\circ$  ( $c$  0.37,  $\text{CHCl}_3$ );  $^1\text{H}$  NMR (300 MHz,  $\text{CDCl}_3$ )  $\delta$  7.72 (d, 2H,  $J = 7.2$  Hz, Ar-**H**), 7.47 (t, 1H,  $J = 7.2$  Hz, Ar-**H**), 7.40 (t, 2H,  $J = 7.2$  Hz, Ar-**H**), 7.20-7.25 (m, 2H, Ar-**H**), 7.11-7.15 (m, 3H, Ar-**H**), 6.41 (d, 1H,  $J = 8.3$ , **NH**), 5.71-5.85 (m, 1H + 1H, **NH** + **CH=CH**<sub>2</sub>), 5.08-5.15 (m, 2H, **CH=CH**<sub>2</sub>), 4.04-4.16 (m, 1H, **NCH**), 3.88-4.00 (m, 1H, **NCH**), 2.57-2.73 (m, 2H, **PhCH**<sub>2</sub>), 2.33-2.54 (m, 2H, **CH**<sub>2</sub>**CH=CH**<sub>2</sub>), 1.75-2.03 (m, 2H + 2H + 3H, **PhCH**<sub>2</sub>**CH**<sub>2</sub>, **CHCH**<sub>2</sub>**CH**, **C=OCH**<sub>3</sub>);  $^{13}\text{C}$  NMR (75 MHz,  $\text{CDCl}_3$ )  $\delta$  170.3, 167.3, 141.4, 134.4, 134.3, 131.5, 128.6, 128.4, 128.3, 126.8, 126.0, 118.3, 46.9, 46.8, 39.2, 38.8, 36.4, 32.6, 23.5; IR (thin film) 3287, 3064, 3028, 2953, 2925, 2856, 1636, 1539, 1491, 1440, 1373, 1313, 1265, 1093, 1029, 916, 802, 752, 699  $\text{cm}^{-1}$ ; LRMS (FAB+) calcd for  $\text{C}_{23}\text{H}_{29}\text{N}_2\text{O}_2$ : 365 ( $[\text{M}+\text{H}]^+$ ), found 365 ( $[\text{M}+\text{H}]^+$ ).

**Proof of relative stereochemistry of the cycloaddition products and 6:** The relative stereochemistry of the cycloaddition products and compound **6** was determined by selective 1D NOESY experiments as illustrated in Scheme 1:

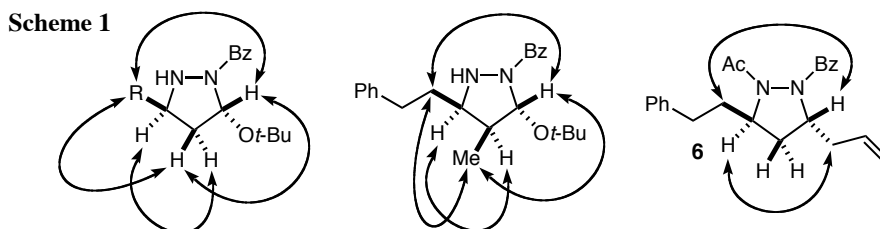



**Proof of absolute configuration of the cycloaddition products:** The *p*-nitrobenzoylhydrazone of dihydrocinnamaldehyde was prepared and subjected to the cycloaddition reaction with *tert*-butyl vinyl ether (Scheme 2). The product is a known compound previously prepared by Kobayashi and coworkers.<sup>2</sup> Comparison of the chiral HPLC traces (DAICEL Chiralpak AD-H, hexane/*i*-PrOH = 97.5/2.5, 0.8 mL/min, retention time = 25.6 (minor) and 33.5 (major) min) allowed the assignment of absolute stereochemistry for this cycloaddition product. The absolute configurations of all other cycloaddition products were assigned by analogy.

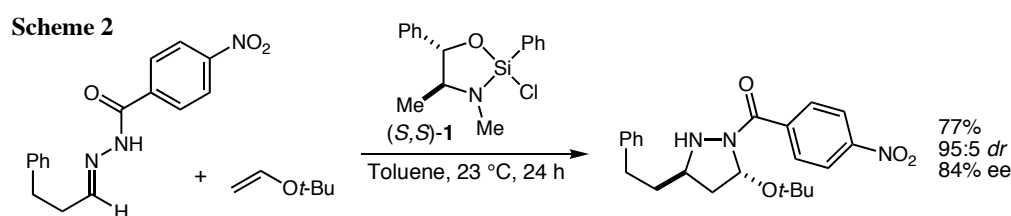

### Determination of ee of the cycloaddition products by chiral HPLC analysis:

**Table 1, entry 1:** DAICEL Chiralpak AD-H, hexane/EtOH = 97/3, 1.0 mL/min.

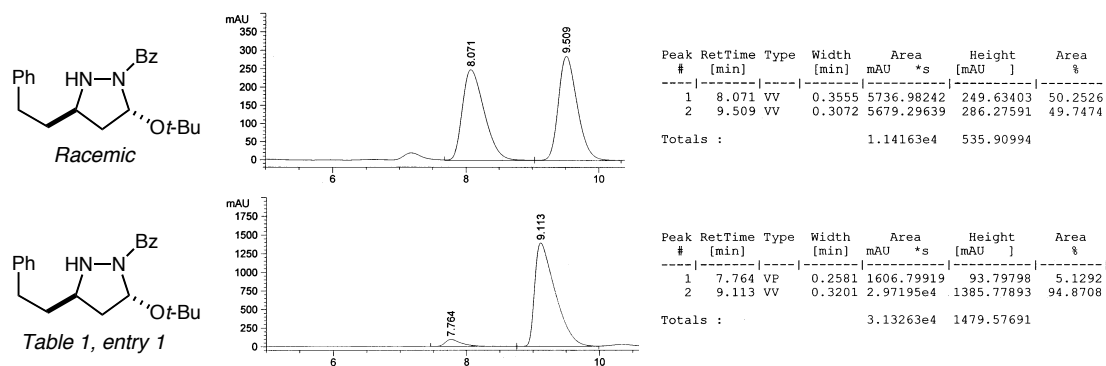

**Table 1, entry 2:** DAICEL Chiralpak AD-H, hexane/EtOH = 95/5, 1.0 mL/min.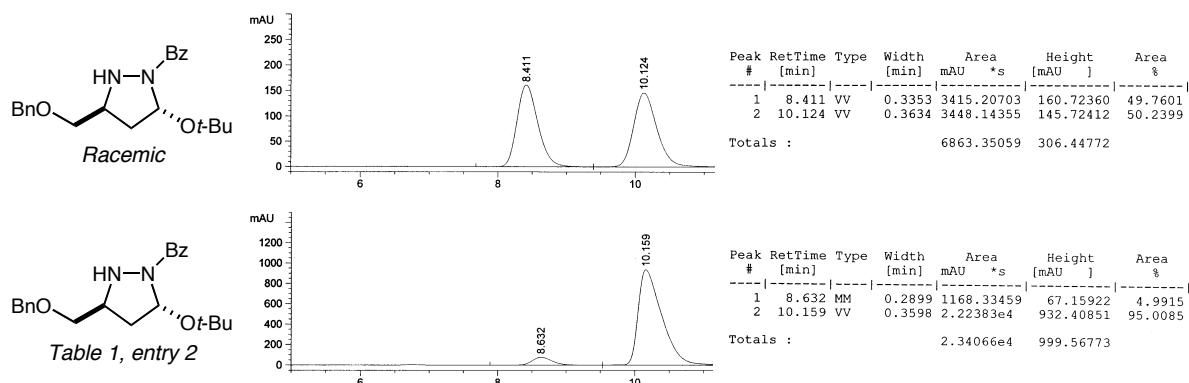**Table 1, entry 3:** DAICEL Chiralcel OD, hexane/*i*-PrOH = 99/1, 0.7 mL/min.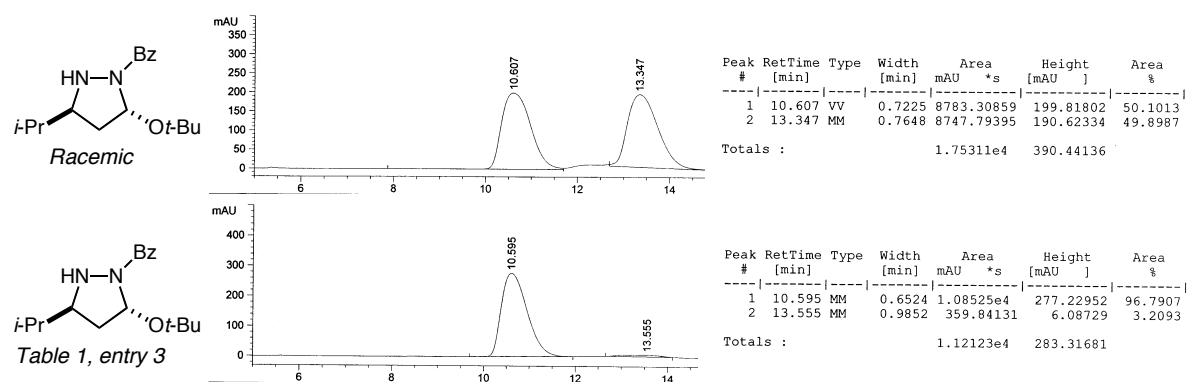**Table 1, entry 4:** DAICEL Chiralcel OD, hexane/*i*-PrOH = 99/1, 1.0 mL/min.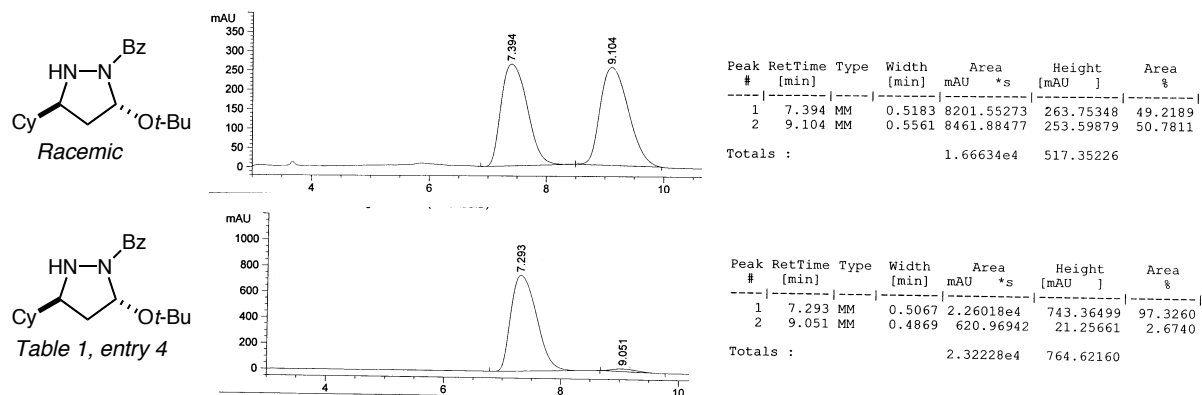

**Table 1, entry 5:** DAICEL Chiralcel OD, hexane/*i*-PrOH = 99/1, 1.0 mL/min.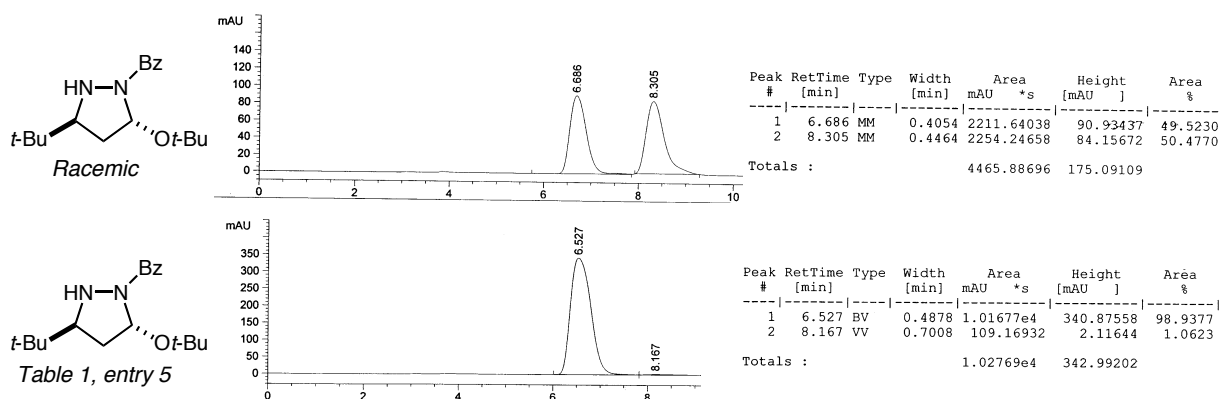**Table 1, entry 6:** DAICEL Chiralcel OD, hexane/*i*-PrOH = 99/1, 1.0 mL/min.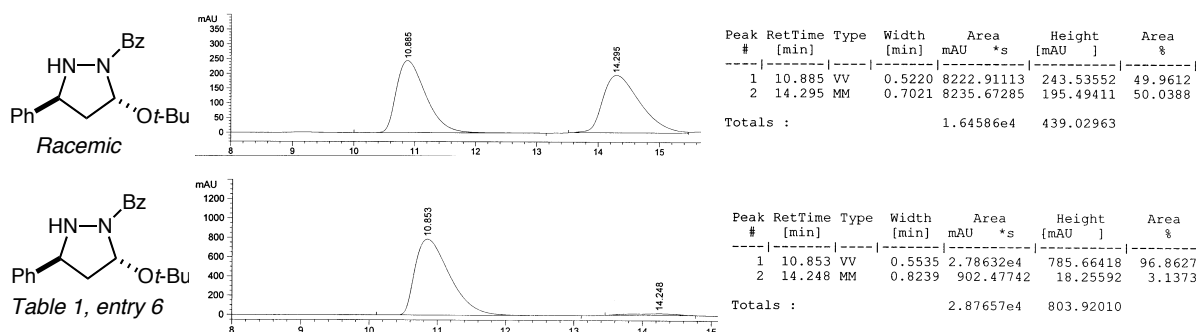**Table 1, entry 7:** DAICEL Chiralcel OD, hexane/*i*-PrOH = 99/1, 1.0 mL/min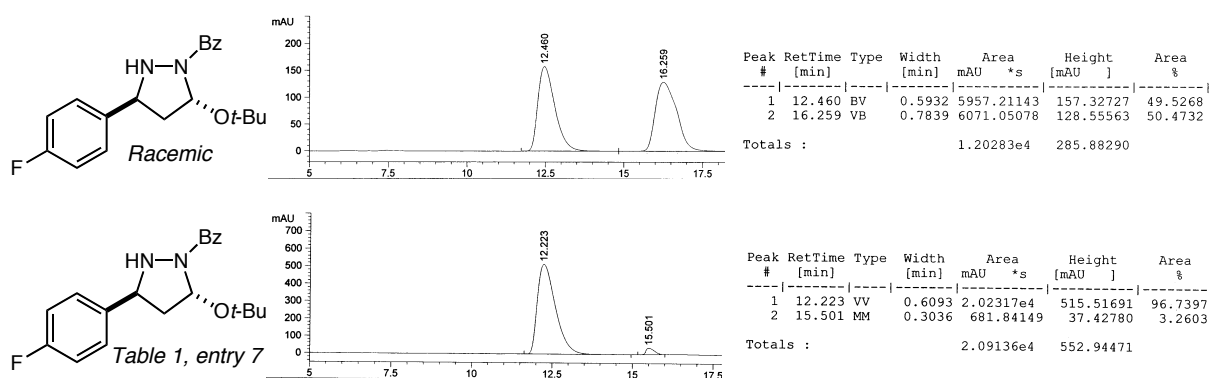

**Table 1, entry 8:** DAICEL Chiralcel OD, hexane/*i*-PrOH = 97/3, 1.0 mL/min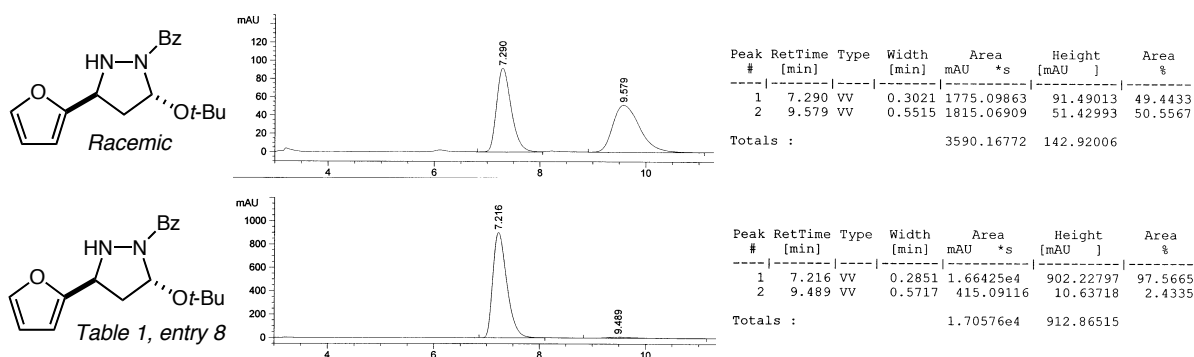**Product from Scheme 4:** DAICEL Chiralcel OJ-H, hexane/EtOH = 93/7, 1.0 mL/min.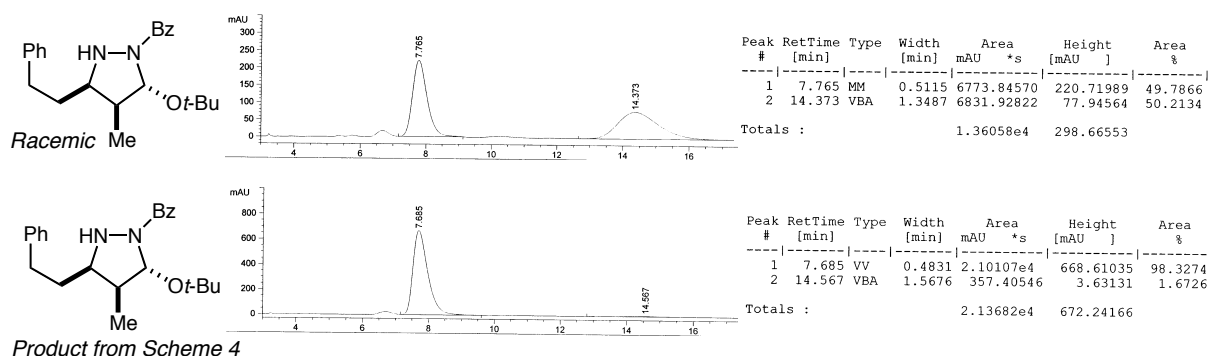**<sup>1</sup>H NMR Spectra of the cycloaddition products and compounds 6 and 7 from Scheme 6:**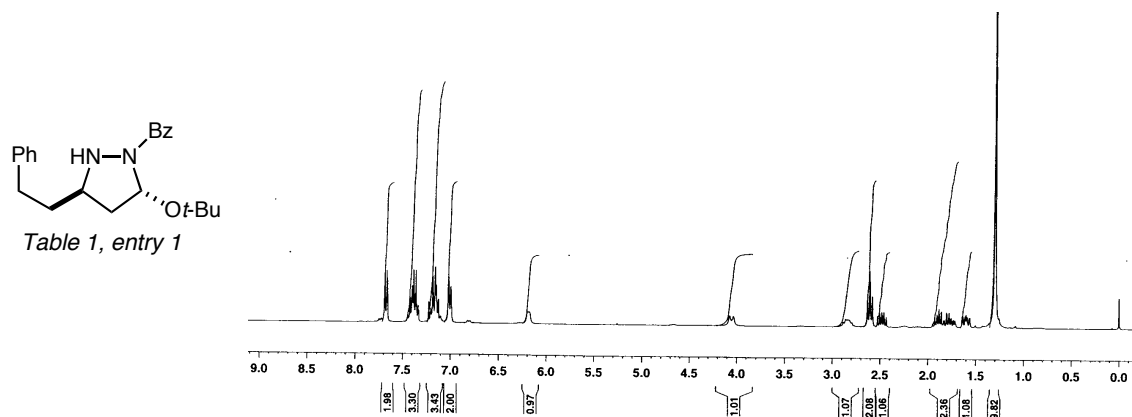

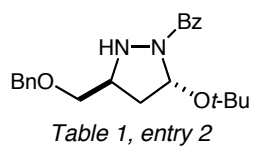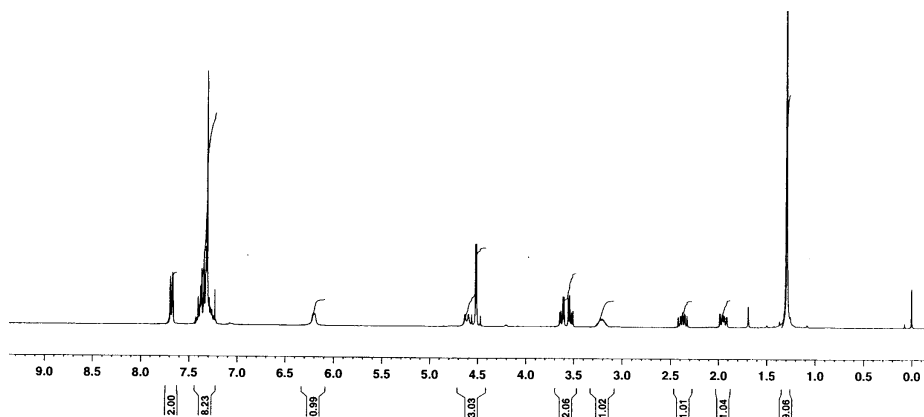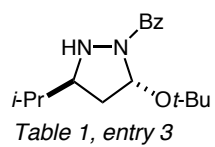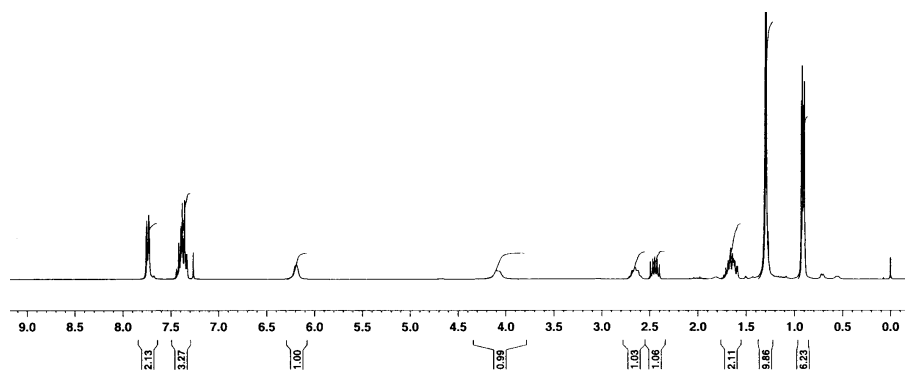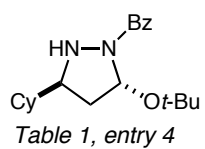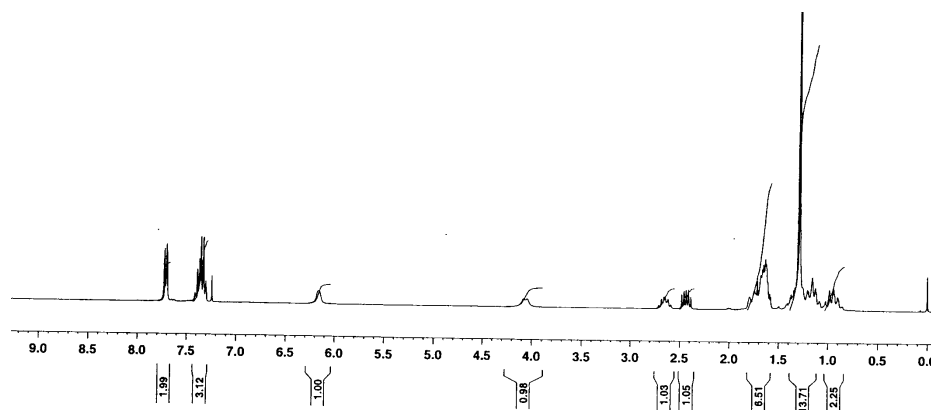

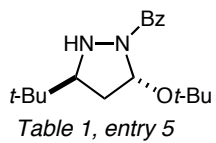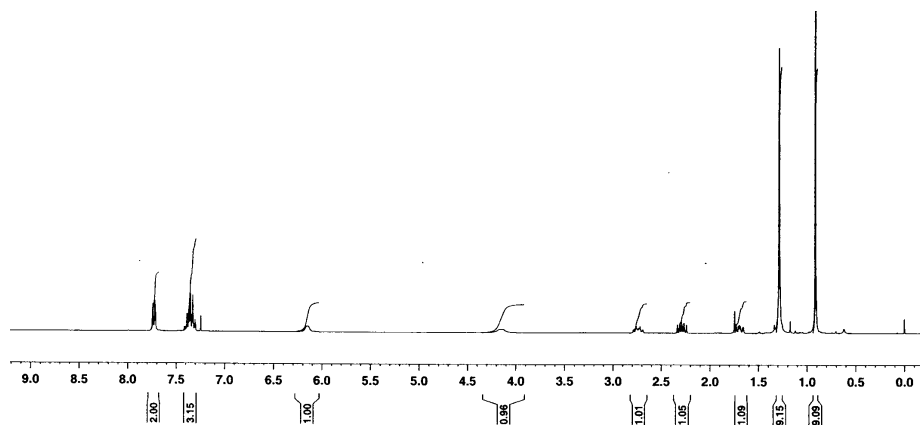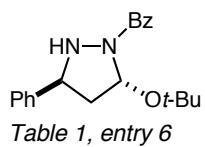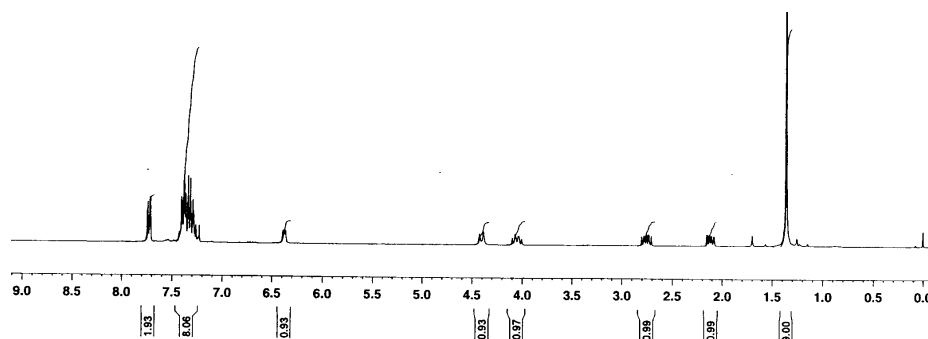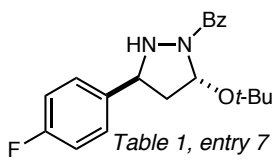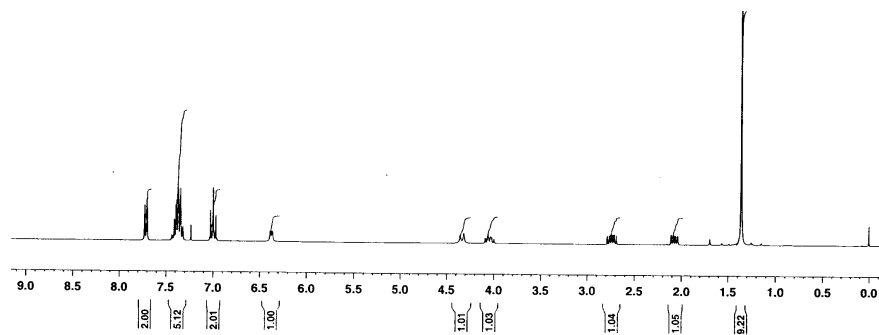

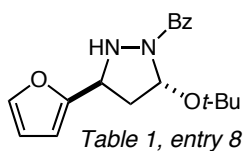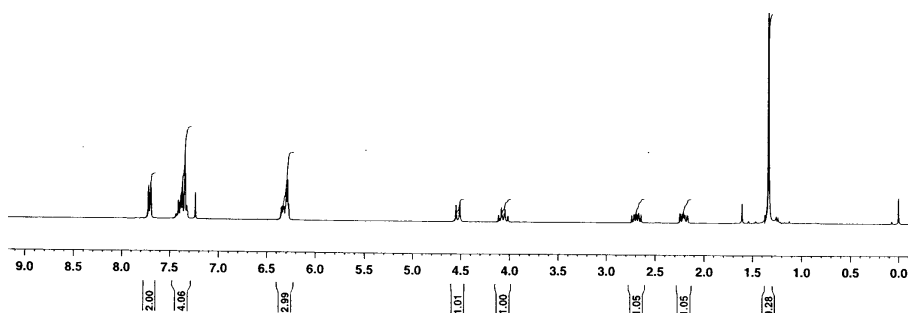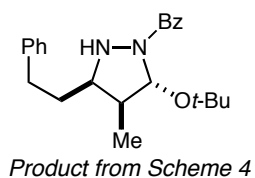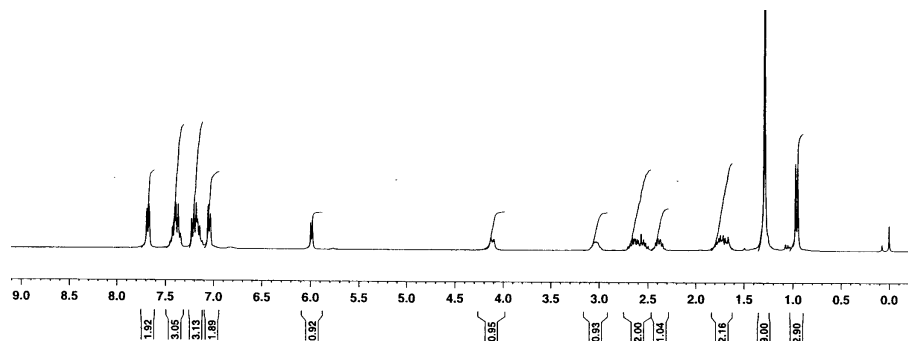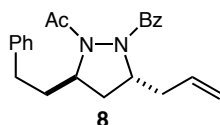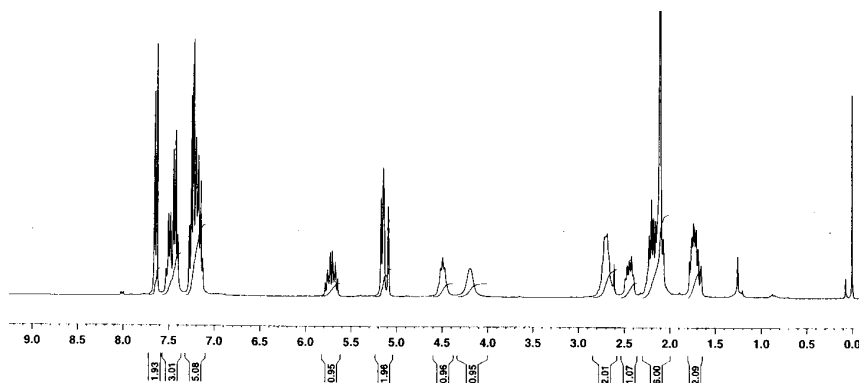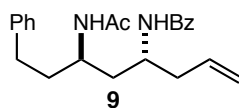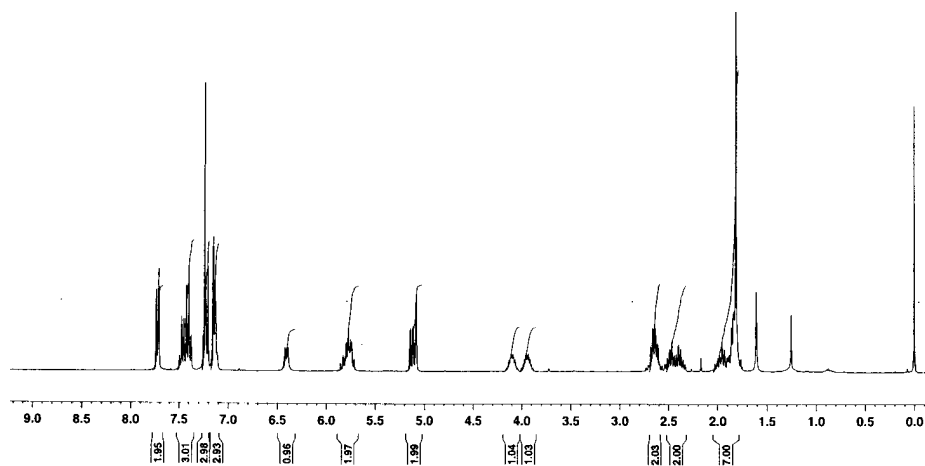

Supplement: Supplementary file 1 [file 5217103]
